# Supplementary material for: TheGata5target,TGIF2, defines the pancreatic region by modulating BMP signals within the endoderm
Source: Oxford University Press journal article supplement (doi:10.1242/dev.008458), 2007-12-20
Supplement: dev008458-tables1.pdf [file dev008458-tables1.pdf]

**Table S1. Array clones upregulated and downregulated by *Gata5***

| Clone ID                                        | Fold change | Sequence ID*                                                                                    |
|-------------------------------------------------|-------------|-------------------------------------------------------------------------------------------------|
| <b>Array clones upregulated by <i>Gata5</i></b> |             |                                                                                                 |
| S10-8-G5                                        | 6.80        | Holocytochrome c synthase                                                                       |
| S10-10-C11                                      | 5.45        | xEST similar to Fe-S binding domain containing protein [BC089254]                               |
| S10-8-E3                                        | 5.00        | Pecanex homolog                                                                                 |
| S10-8-G6                                        | 4.65        | Histone-binding protein N1/N2 [P06180]                                                          |
| S10-10-B11 <sup>††</sup>                        | 4.58        | Frizzled7                                                                                       |
| S10-55-F7                                       | 4.57        | xEST similar to acyl-CoA synthetase [Homo S; BC043850]                                          |
| S10-57-G4                                       | 4.39        | xEST similar to cathepsin [Rat N.]                                                              |
| S10-40-D8                                       | 4.20        | Glutamine synthetase                                                                            |
| S10-55-H4                                       | 4.14        | xEST similar to histone H3-lysine 4-specific methyltransferase [Homo S.; NM_001032339]          |
| S10-55-G4                                       | 4.12        | xEST tailbud [BJ086227]                                                                         |
| S10-7-B10                                       | 4.08        | Cytochrome c oxydase                                                                            |
| S10-57-G12                                      | 4.07        | xEST [BP707638]                                                                                 |
| S10-24-B9                                       | 4.05        | Glycogenin 1                                                                                    |
| S10-8-G4                                        | 4.01        | Akt2                                                                                            |
| S10-8-G7                                        | 3.92        | xEST gastrula st. [BG410203 ]                                                                   |
| S10-8-E4                                        | 3.90        | xEST similar to Rab6-interacting protein 2 [BC068939]                                           |
| S10-57-H9                                       | 3.78        | Coco                                                                                            |
| S10-59-B1                                       | 3.73        | Xenopus laevis hypothetical protein LOC398481 [BC042237]                                        |
| S10-36-E9 <sup>†</sup>                          | 3.71        | Keratin 18                                                                                      |
| S10-10-D11                                      | 3.66        | xEST similar to solute carrier family 25 protein [BC082409 ]                                    |
| S10-45-D5 <sup>†</sup>                          | 3.65        | X. laevis dsRNA-binding protein 4F.1 [XLU07155]                                                 |
| S10-12-G3                                       | 3.60        | Nuclear RNase helicase [BC106294]                                                               |
| S10-57-H3                                       | 3.58        | Nuclease sensitive element-binding protein 1 [AF550003]                                         |
| S10-56-C11                                      | 3.55        | Ribosomal protein L3                                                                            |
| S10-10-B12 <sup>†</sup>                         | 3.53        | xEST similar to Ring finger protein 128/E3 ubiquitin ligase [AY112655]                          |
| S10-57-H4                                       | 3.50        | xEST                                                                                            |
| S10-10-C1                                       | 3.48        | NADH dehydrogenase                                                                              |
| S10-8-C11                                       | 3.43        | xEST similar to hypothetical protein KIAA0592 [BG410148]                                        |
| S10-55-F4                                       | 3.43        | dUTP pyrophosphatase                                                                            |
| S10-10-G3                                       | 3.43        | PolyA polymerase type 2                                                                         |
| S10-57-B3                                       | 3.42        | Hypothetical protein inositol monophosphatase family [BC068839]                                 |
| S10-10-A6                                       | 3.40        | xEST similar to Xenopus laevis osteocalcin gene                                                 |
| S10-57-G3                                       | 3.38        | K <sup>+</sup> channel beta 2 subunit                                                           |
| S10-55-F2                                       | 3.38        | Flice-like inhibitory protein [AY519261]                                                        |
| S10-13-D2                                       | 3.34        | xEST [Rattus N. pancreatic islet; BP480872]                                                     |
| S10-8-B11                                       | 3.33        | Syntaxin 6                                                                                      |
| S10-5-A1                                        | 3.29        | ODC                                                                                             |
| S10-8-B10 <sup>†</sup>                          | 3.25        | Zn finger protein XFDL 141 [XLU65897]                                                           |
| S10-10-C8                                       | 3.24        | xEST similar to Catalase [BI938710]                                                             |
| S10-4-B8                                        | 3.22        | Heat shock 90kDa protein beta                                                                   |
| S10-7-G4 <sup>†</sup>                           | 3.15        | Targeting protein for Xklp2 or Hepatocellular carcinoma-associated antigen 519 [AF244546]       |
| S10-57-F4 <sup>†</sup>                          | 3.08        | SMARCE1 (SWI/SNF related, matrix associated, actin dependent regulator of chromatin) [BC041216] |
| S10-8-D12                                       | 3.06        | xEST similar to hypothetical protein [BC059331]                                                 |
| S10-8-A9                                        | 3.04        | Lactate dehydrogenase-B (LDH-B)                                                                 |
| S10-8-D4                                        | 3.03        | xEST similar to origin recognition complex, subunit 6 [BC077746]                                |
| S10-8-H6                                        | 3.01        | xEST similar to Rab5 exchange factor [Mus musculus; BG410214]                                   |
| S10-8-C8                                        | 3.00        | xEST similar to KIAA0092 [Homo S.; BG410156]                                                    |
| S10-57-H10                                      | 2.99        | Cytosolic nonspecific dipeptidase [BC056069]                                                    |
| S10-8-H7                                        | 2.95        | xEST [BG410215]                                                                                 |
| S10-8-C10                                       | 2.95        | Delta-tubulin                                                                                   |
| S10-5-C8                                        | 2.93        | Cyclin A2                                                                                       |
| S10-7-C5                                        | 2.88        | Hepatoma Derived Growth Factor [BG410058]                                                       |
| S10-4-B9                                        | 2.82        | xEST [Q9925510]                                                                                 |
| S10-7-G8                                        | 2.80        | xEST similar to Euchromatic histone lysine N-methyltransferase 2 (G9A) [Mus musculus]           |
| S10-7-H8 <sup>†</sup>                           | 2.77        | Methionyl aminopeptidase 1 (metap1) [BC046685]                                                  |
| S10-52-F7 <sup>†</sup>                          | 2.77        | Cyclophilin A [AF549946]                                                                        |
| S10-33-B9                                       | 2.74        | xEST similar to HpaII tiny fragments locus 9c [DR716804]                                        |
| S10-8-D11                                       | 2.71        | xEST similar to CDC42 binding protein kinase beta [BC088807]                                    |
| S10-27-C7 <sup>††</sup>                         | 2.71        | Frizzled7                                                                                       |

|                         |      |                                                                                               |
|-------------------------|------|-----------------------------------------------------------------------------------------------|
| S10-24-C8               | 2.66 | xEST similar to Ring finger and WD repeat domain 2 [X. tropicalis; NM_001016199]              |
| S10-7-H7                | 2.59 | xEST similar to Zinc finger protein 84 (Zinc finger protein HPF2) [Homo S.; BG410119]         |
| S10-7-F4                | 2.59 | xEST similar to Human paraneoplastic cerebellar degeneration-associated antigen [BC080065]    |
| S10-8-G3                | 2.57 | xEST similar to Transmembrane protein 59 precursor (Liver membrane-bound protein) [BC084373]  |
| S10-7-H11               | 2.57 | xEST similar to Xenopus hypothetical protein LOC495203 [BC084439]                             |
| S10-7-G10               | 2.51 | xEST similar to human Solute carrier family 6 [BC068835]                                      |
| S10-45-D3 <sup>ts</sup> | 2.49 | Interleukin enhancer binding factor 2 [AF549922]                                              |
| S10-57-D8 <sup>†</sup>  | 2.47 | xFRS2 [AB064525]                                                                              |
| S10-8-G11               | 2.46 | Fatso [BC079990]                                                                              |
| S10-8-B5                | 2.44 | xESTsimilar to NP_976046.1 F-box protein 33 [Homo sapiens]                                    |
| S10-7-H3                | 2.44 | xEST similar to leucine zipper-EF-hand containing transmembrane protein 2 [Homo S.; BG410115] |
| S10-8-C3                | 2.43 | xEST similar MBIP protein [Homo sapiens]                                                      |
| S10-8-E5                | 2.41 | xEST similar rho GDP-dissociation inhibitor alpha [BC073126]                                  |
| S10-7-C7                | 2.41 | BMP7                                                                                          |
| S10-8-C4                | 2.37 | xEST [BG410152]                                                                               |
| S10-7-A6                | 2.36 | xEST similar to protein tyrosine kinase 9 related protein [Mus musculus; BC082477]            |
| S10-7-A1                | 2.35 | Glycerol kinase [BC056091]                                                                    |
| S10-8-D5                | 2.33 | SMARCB1/SNF5 homolog INI1 [BC072865]                                                          |
| S10-7-B7                | 2.33 | xEST similar to 3'UTR of hypothetical protein [BC094159]                                      |
| S10-7-B8                | 2.29 | Breast cancer metastasis-suppressor 1-like [BC077352]                                         |
| S10-10-B3 <sup>†</sup>  | 2.23 | Double-stranded RNA-binding zinc finger protein JAZ [BC041713]                                |
| S10-8-E8                | 2.22 | xEST similar to autoantigen [BC044263]                                                        |
| S10-27-B7 <sup>‡</sup>  | 2.22 | Keratin 18 [BC054993]                                                                         |
| S10-24-B8 <sup>†</sup>  | 2.22 | Phosphorylase phosphatase [BC070965]                                                          |
| S10-8-D2                | 2.17 | Adp-ribosylation factor 6 [BC044124]                                                          |
| S10-8-H5 <sup>†</sup>   | 2.15 | Ras-GTPase-activating protein SH3-domain-binding protein (g3bp) [BC045051]                    |
| S10-8-B12               | 2.15 | Transcriptional repressor protein YY1 [BC079731]                                              |
| S10-7-B5                | 2.15 | xEST similar hypothetical protein BC013949 [Homo sapiens]                                     |
| S10-24-F3               | 2.14 | Cytoskeletal actin type-8                                                                     |
| S10-8-B6                | 2.13 | xEST similar to Translation initiation factor 4E                                              |
| S10-7-F6                | 2.13 | Calumenin                                                                                     |
| S10-57-G10 <sup>†</sup> | 2.13 | TAB 3 [AF549911]                                                                              |
| S10-8-C7                | 2.12 | LUC7-like [BC043766]                                                                          |
| S10-7-G5                | 2.09 | xEST similar to Ring finger protein 41 [Homo S; BC084252]                                     |
| S10-45-H5 <sup>†</sup>  | 2.09 | Prothymosin [AF549891]                                                                        |
| S10-8-E6                | 2.08 | xEST [BG410178]                                                                               |
| S10-8-C5                | 2.07 | xEST similar to UDP-glucose-glycoprotein glucosyltransferase [BG410153]                       |
| S10-8-A10               | 2.07 | xEST gastrula st. [BG410123]                                                                  |
| S10-55-F11              | 2.04 | Syndecan 2 [AF549999]                                                                         |
| S10-7-G9                | 2.03 | xEST similar to hypothetical protein [BG410109]                                               |
| S10-6-B7 <sup>‡</sup>   | 2.03 | xEST similar to Syntaxin-11 [BC068820]                                                        |
| S10-8-B1                | 2.02 | TGFB-induced factor 2 [BC081037]                                                              |
| S10-55-B7 <sup>‡</sup>  | 2.02 | Syntaxin-11                                                                                   |

---

**Array clones downregulated by Gata5**

|            |       |                                                                                        |
|------------|-------|----------------------------------------------------------------------------------------|
| S10-45-H6  | -6.51 | Ribosomal protein L23a [Homo S.]                                                       |
| S10-6-B4   | -4.87 | xEST gastrula st. [BG409949]                                                           |
| S10-10-G9  | -3.52 | Splicing factor arg/ser-rich3 (SFRS3; Homo S.)                                         |
| S10-58-H12 | -3.43 | xEST similar to X.laevis XFG 5-1 and XFG 5-2 genes for zinc finger proteins [X71067]   |
| S10-23-H11 | -3.12 | xEST similar to Essential meiotic endonuclease 1 homolog 1 [NP_808420.1; Mus musculus] |
| S10-39-H12 | -2.85 | xEST similar to Mitotic control protein dis3 homolog [Homo S.]                         |
| S10-10-E9  | -2.69 | ATP synthase                                                                           |
| S10-10-H9  | -2.63 | xPbx1b                                                                                 |
| S10-38-B4  | -2.61 | Tumor associated Ca-signal transducer I                                                |
| S10-39-A3  | -2.59 | xEST similar to Na-channel beta1 subunit [Rabbit]                                      |
| S10-38-A4  | -2.58 | CyclinB2                                                                               |
| S10-33-F8  | -2.54 | xEST similar to methyltransferase 24 (3D495) [Gallus gallus]                           |
| S10-38-C8  | -2.49 | Claudin 7L1                                                                            |
| S10-47-B7  | -2.46 | Ribosomal protein S3a                                                                  |
| S10-50-H7  | -2.45 | Map Kinase-interacting Kinase                                                          |
| S10-2-A9   | -2.42 | Myotubularin 1                                                                         |
| S10-51-B9  | -2.40 | xEST [BP679241]                                                                        |
| S10-51-A12 | -2.40 | HnRNP-E2 protein                                                                       |

|            |       |                                                                                                          |
|------------|-------|----------------------------------------------------------------------------------------------------------|
| S10-6-D8   | -2.39 | xEST gastrula st.                                                                                        |
| S10-28-H5  | -2.39 | xEST [BU912627]                                                                                          |
| S10-27-H12 | -2.38 | xEST <i>Xenopus laevis</i> hypothetical LOC496000 [BC087390]                                             |
| S10-54-E9  | -2.34 | Uroplakin III                                                                                            |
| S10-34-H10 | -2.28 | <i>Xenopus laevis</i> hypothetical protein similar to 6-phosphofructo-2-kinase/fructose-2,6-biphosphate2 |
| S10-21-D4  | -2.27 | xEST similar to MFA1-chick                                                                               |
| S10-25-H7  | -2.26 | xEST [BM192054 ]                                                                                         |
| S10-33-H4  | -2.26 | xEST similar to PDZ and LIM domain 1 (elfin) [BC041514]                                                  |
| S10-58-B3  | -2.25 | xEST similar to human Neural Wiskott-Aldrich syndrome protein (N-WASP) [BU905954 ]                       |
| S10-43-E12 | -2.25 | Ribosomal protein S1a                                                                                    |
| S10-21-E4  | -2.23 | xEST similar to human hypothetical protein KIAA0182 [BJ060192 ]                                          |
| S10-21-G6  | -2.21 | Dihydrolipoamide acetyltransferase precursor                                                             |
| S10-51-E4  | -2.19 | xEST similar to <i>Xenopus tropicalis</i> hypothetical LOC493200 [BC080499]                              |
| S10-39-F5  | -2.19 | xEST weakly similar to nucleolar protein 7, 27 kDa [NP_057251.2; Homo sapiens]                           |
| S10-47-F8  | -2.17 | Ubiquitin C                                                                                              |
| S10-23-D4  | -2.17 | Kinesin-like protein (xklp3A gene)                                                                       |
| S10-56-C5  | -2.16 | xEST similar to human small nuclear RNA-activating protein 43 [BJ629672]                                 |
| S10-62-G7  | -2.16 | xEST similar to <i>Xenopus laevis</i> hypothetical LOC495481 [BC085065]                                  |
| S10-54-G3  | -2.14 | Nuclear RNA helicase, DECD variant of DEAD box                                                           |
| S10-6-H2   | -2.14 | xEST similar to hypothetical human protein FLJ10900                                                      |
| S10-39-C3  | -2.14 | <i>Xenopus laevis</i> similar to ubiquinol-cytochrome c reductase core protein 1                         |
| S10-19-H4  | -2.13 | Cold inducible RNA-binding protein                                                                       |
| S10-54-F3  | -2.10 | HMG-14                                                                                                   |
| S10-7-H2   | -2.10 | xEST gastrula st. [BG410114]                                                                             |

---

The closest homologs of these clones are listed.

\*Genes described as modulated by Mixer and/or Sox17beta by Dickinson et al. (Dickinson et al., 2006).

\*Genes that were identified several times in the microarray hybridizations.

§(Spagnoli and Brivanlou, 2006).

---
